# Supplementary material for: Determinants of Vaccination Uptake in Risk Populations: A Comprehensive Literature Review
Source: MDPI journal article supplement (doi:10.3390/vaccines8030480), 2020-08-27
Supplement: s1 [file s1]

**Table S1.** Health behaviour theories on the basis of the I-Change model.

| <b>Health-behaviour Model (abbreviation)</b> | <b>Author, year</b>                        | <b>Components or Constructs or Stages (→)</b>                                                                                                                                                                                                                        | <b>Based on</b>                        |
|----------------------------------------------|--------------------------------------------|----------------------------------------------------------------------------------------------------------------------------------------------------------------------------------------------------------------------------------------------------------------------|----------------------------------------|
| Health Belief Model (HBM)                    | Hochbaum, Kegels & Rosenstock, 1952<br>[1] | <ul style="list-style-type: none"> <li>• Perceived susceptibility, severity, benefits and barriers</li> <li>• Self-efficacy</li> <li>• Call-to-action</li> </ul>                                                                                                     |                                        |
| Theory of Reasoned Action (TRA)              | Fishbein, Ajzen, 1967<br>[2]               | <ul style="list-style-type: none"> <li>• Attitude toward behaviour</li> <li>• Subjective norms</li> <li>• Intention to engage in a certain behavior</li> </ul>                                                                                                       |                                        |
| Trans-Theoretical Model (TTM)                | Prochaska, DiClemente, 1977<br>[3]         | <ul style="list-style-type: none"> <li>• Precontemplation →</li> <li>• Contemplation →</li> <li>• Preparation →</li> <li>• Action →</li> <li>• Maintenance →</li> <li>• Termination</li> </ul>                                                                       |                                        |
| Theory of Planned Behaviour (TPB)            | Ajzen, 1985<br>[4]                         | <ul style="list-style-type: none"> <li>• Attitude toward behaviour</li> <li>• Subjective norm</li> <li>• Perceived behaviour control</li> <li>• Intention to behaviour</li> <li>• Behaviour</li> </ul>                                                               | TRA                                    |
| Social Cognitive Theory (SCT)                | Bandura, 1986<br>[5]                       | <ul style="list-style-type: none"> <li>• Reciprocal Determinism (interaction person-environment-behaviour)</li> <li>• Behavioural Capability</li> <li>• Observational Learning</li> <li>• Reinforcements</li> <li>• Expectations</li> <li>• Self-efficacy</li> </ul> | Social Learning Theory (Bandura, 1960) |
| Precaution Adoption Process Model (PAPM)     | Weinstein, 1988<br>[6]                     | <ul style="list-style-type: none"> <li>• Unaware →</li> <li>• Unengaged →</li> <li>• Undecided →</li> </ul>                                                                                                                                                          |                                        |

|                                                    |                                         |                                                                                                                                                                                                                                                      |                             |
|----------------------------------------------------|-----------------------------------------|------------------------------------------------------------------------------------------------------------------------------------------------------------------------------------------------------------------------------------------------------|-----------------------------|
|                                                    |                                         | <ul style="list-style-type: none"> <li>• Decided not to act OR</li> <li>• Decided to act →</li> <li>• Acting →</li> <li>• Maintenance</li> </ul>                                                                                                     |                             |
| Attitude - Social Influence - Efficacy model (ASE) | De Vries, Dijkstra, & Kuhlman, 1988 [7] | <ul style="list-style-type: none"> <li>• Attitude</li> <li>• Social Influence</li> <li>• Self-Efficacy</li> </ul>                                                                                                                                    |                             |
| Integrated Change Model (I-Change)                 | De Vries, 2004 [8]                      | <ul style="list-style-type: none"> <li>• Predisposing determinants</li> <li>• Awareness determinants</li> <li>• Information determinants</li> <li>• Motivation determinants</li> <li>• Intention</li> <li>• Abilities</li> <li>• Barriers</li> </ul> | ASE, TRA, SCT, TTM and PAPM |

Abbreviations: HBM = Health Belief Model; TRA = Theory of Reasoned Action; TTM = Trans-Theoretical Model; TPB = Theory of Planned Behaviour; SCT = Social Cognitive Theory; PAPM = Precaution Adoption Process Model; ASE = Attitude Social Influence Efficacy model; I-Change = Integrated Change Model.

## References

1. Taylor, D.; Bury, M.; Campling, N.; Carter, S.; Garfield, D.; Newbould, D.J.; Rennie, D.T. *A review of the use of the health belief model (hbm), the theory of reasoned action (tra), the theory of planned behaviour (tpb) and the trans-theoretical model (ttm) to study and predict health related behaviour change*; National Institute for Health and Clinical Excellence: London, UK, 2006.
2. LaCaille, L. Theory of reasoned action. In *Encyclopedia of behavioral medicine*, Gellman, M.D.; Turner, J.R., Eds. Springer New York: New York, NY, 2013; pp 1964–1967.
3. Prochaska, J.O.; Velicer, W.F. The transtheoretical model of health behavior change. *American Journal of Health Promotion* **1997**, *12*, 38–48.
4. Ajzen, I. The theory of planned behavior In *Organizational behavior and human decision processes*, Academic Press. Inc.: 1991; Vol. 50, pp 179–211.
5. Bandura, A. Social cognitive theory. Available online: <https://www.sciencedirect.com/topics/immunology-and-microbiology/social-cognitive-theory> (accessed on 31 December 2019),
6. Weinstein, N.D.; Sandman, P.M.; Blalock, S.J. The precaution adoption process model. In *Health behavior and health education*, 2008; pp 123–147.

7. de Vries, H.; Dijkstra, M.; Kuhlman, P. Self-efficacy: The third factor besides attitude and subjective norm as a predictor of behavioural intentions. *Health Educat. Res.* **1988**, *3*, 273–282.
8. de Vries, H.; Mudde, A.; Leijds, I.; Charlton, A.; Vartiainen, E.; Buijs, G.; Clemente, M.P.; Storm, H.; Navarro, A.G.; Nebot, M., *et al.* The european smoking prevention framework approach (efsa): An example of integral prevention. *Health Educat. Res.* **2003**, *18*, 611–626.
