# Supplementary material for: Determinants of Vaccination Uptake in Risk Populations: A Comprehensive Literature Review
Source: MDPI journal article supplement (doi:10.3390/vaccines8030480), 2020-08-27
Supplement: s1 [file s1]

## Supplementary File S1. Search strings for databases

| Database searched              | via              | Years of coverage | References  | After de-duplication |
|--------------------------------|------------------|-------------------|-------------|----------------------|
| Embase                         | Embase.com       | 1971 - Present    | 1306        | 1293                 |
| Medline ALL                    | Ovid             | 1946 - Present    | 467         | 114                  |
| CINAHL                         | EBSCO            | 1982 - Present    | 29          | 1                    |
| Web of Science Core Collection | Web of Knowledge | 1975 - Present    | 99          | 14                   |
| PsycINFO                       | Ovid             | 1806 - Present    | 233         | 187                  |
| ERIC                           | Ovid             | 1965 - Present    | 41          | 37                   |
| SocINDEX                       | EBSCO            | 1895 - Present    | 52          | 28                   |
| <b>Total</b>                   |                  |                   | <b>2227</b> | <b>1674</b>          |

*References before 2010: 403 (exclusion folder in EndNote)*

*References since 2010: 1271 (unfiled in EndNote)*

### Embase.com

((('vaccination coverage'/de OR (((vaccin\* OR immuniz\* OR immunis\*) NEAR/3 (cover\* OR uptake\* OR adherence\* OR compliance\* OR hesitan\* OR behavior\* OR behaviour\* OR decision\* OR status\* OR rate\* OR acceptanc\* OR refus\*)))):ab,ti,kw) AND ('behavior'/exp OR (((behavior\* OR behaviour\* OR habit\* OR practice\* OR attitude\* OR ASE OR trans-theor\* OR health-belief\* OR social-cognitive\* OR precautions-adoption-process\* OR integrated-change\* OR i-change\* OR theor\*) NEAR/3 (change\* OR modif\* OR alter\* OR model\* OR framework\* OR intervention\* OR theor\*)) OR fishbein OR ajzen OR prochaska OR diclemente OR hochbaum OR kegels OR rosenstock OR bandura OR Weinstein OR de- vries):ab,ti,kw) AND ('immunocompromised patient'/de OR 'autoimmune disease'/exp OR 'inflammatory bowel disease'/exp OR 'Human immunodeficiency virus infected patient'/exp OR 'graft recipient'/de OR 'cancer patient'/exp OR (immunocompromi\* OR compromi\* OR immunosuppress\* OR autoimmune\* OR auto-immune\* OR arthritis\* OR rheuma\* OR psoriasis\* OR IBD OR SLE OR lupus\* OR systemic-scleros\* OR inflammatory-bowel\* OR crohn\* OR colitis\* OR ((HIV OR immunodeficiency OR cancer\*) NEAR/3 (patient\* OR adult\* OR survivor\* OR person\*)) OR ((transplant\* OR graft\*) NEAR/3 (recipient\* OR host\* OR stem-cell\* OR organ\*)))):ab,ti,kw)) OR (((('vaccination coverage'/de AND 'health care personnel'/exp) OR (((vaccin\* OR immuniz\* OR immunis\*) NEAR/3 (cover\* OR uptake\* OR adherence\* OR compliance\* OR hesitan\* OR behavior\* OR behaviour\* OR decision\* OR status\* OR rate\* OR acceptanc\* OR refus\*) NEAR/3 (clinician\* OR nurs\* OR physician\* OR specialist\* OR doctor\* OR personnel OR provider\* OR health-care-worker\* OR HCWs OR HCW OR professional\* OR practitioner\*)))):ab,ti,kw) AND ('behavior'/exp OR (((behavior\* OR behaviour\* OR ASE OR trans-theor\* OR health-belief\* OR

social- cognitive\* OR precautions-adoption-process\* OR integrated-change\* OR i-change\* OR theor\*) NEAR/3 (change\* OR modif\* OR alter\* OR model\* OR framework\* OR intervention\* OR theor\*)) OR fishbein OR ajzen OR prochaska OR diclemente OR hochbaum OR kegels OR rosenstock OR bandura OR Weinstein OR de-vries):ab,ti,kw)) **OR** (('vaccination coverage'/de OR (((vaccin\* OR immuniz\* OR immunis\* OR guideline\*) NEAR/3 (cover\* OR uptake\* OR adherence\* OR compliance\* OR hesitan\* OR behavior\* OR behaviour\* OR decision\* OR status\* OR rate\* OR acceptanc\* OR refus\*)))):ab,ti,kw) AND ('behavior'/exp

OR (((behavior\* OR behaviour\* OR habit\* OR practice\* OR attitude\* OR ASE OR trans-theor\* OR health- belief\* OR social-cognitive\* OR precautions-adoption-process\* OR integrated-change\* OR i-change\* OR theor\*) NEAR/3 (change\* OR modif\* OR alter\* OR model\* OR framework\* OR intervention\* OR theor\*)) OR fishbein OR ajzen OR prochaska OR diclemente OR hochbaum OR kegel OR rosenstock OR bandura OR Weinstein OR de-vries):ab,ti,kw) AND ('travel'/de OR 'tourism'/de OR (travel\* OR VFR OR visiting- friends-and-relatives\* OR expat\* OR emigrant\* OR pilgrim\* OR touris\*):ab,ti,kw)) AND [english]/lim NOT ([Conference Abstract]/lim AND [1800-2017]/py)

## Medline (Ovid)

((Vaccination Coverage/ OR (((vaccin\* OR immuniz\* OR immunis\*) ADJ3 (cover\* OR uptake\* OR adherence\* OR compliance\* OR hesitan\* OR behavior\* OR behaviour\* OR decision\* OR status\* OR rate\* OR acceptanc\* OR refus\*)))ab,ti,kf.) AND (exp Behavior/ OR (((behavior\* OR behaviour\* OR habit\* OR practice\* OR attitude\* OR ASE OR trans-theor\* OR health-belief\* OR social-cognitive\* OR precautions-adoption-process\* OR integrated-change\* OR i-change\* OR theor\*) ADJ3 (change\* OR modif\* OR alter\* OR model\* OR framework\* OR intervention\* OR theor\*)) OR fishbein OR ajzen OR prochaska OR diclemente OR hochbaum OR kegel OR rosenstock OR bandura OR Weinstein OR de- vries).ab,ti,kf.) AND (Immunocompromised Host/ OR exp Autoimmune Diseases/ OR exp Inflammatory Bowel Diseases/ OR Transplant Recipients/ OR (immunocompromi\* OR compromi\* OR immunosuppress\* OR autoimmune\* OR auto-immune\* OR arthritis\* OR rheuma\* OR psoriasis\* OR IBD OR SLE OR lupus\* OR systemic-scleros\* OR inflammatory-bowel\* OR crohn\* OR colitis\* OR ((HIV OR immunodeficiency OR cancer\*) ADJ3 (patient\* OR adult\* OR survivor\* OR person\*)) OR ((transplant\* OR graft\*) ADJ3 (recipient\* OR host\* OR stem-cell\* OR organ\*)))ab,ti,kf.)) OR (((Vaccination Coverage/ AND exp Health Personnel/) OR (((vaccin\* OR immuniz\* OR immunis\*) ADJ3 (cover\* OR uptake\* OR adherence\* OR compliance\* OR hesitan\* OR behavior\* OR behaviour\* OR decision\* OR status\* OR rate\* OR acceptanc\* OR refus\*) ADJ3 (clinician\* OR nurs\* OR physician\* OR specialist\* OR doctor\* OR personnel OR provider\* OR health-care-worker\* OR HCWs OR HCW OR professional\* OR practitioner\*)))ab,ti,kf.) AND (exp Behavior/ OR (((behavior\* OR behaviour\* OR ASE OR trans-theor\* OR health-belief\* OR social-cognitive\* OR precautions-adoption-process\* OR integrated-change\* OR i- change\* OR theor\*) ADJ3 (change\* OR modif\* OR alter\* OR model\* OR framework\* OR intervention\* OR theor\*)) OR fishbein OR ajzen OR prochaska OR diclemente OR hochbaum OR kegel OR rosenstock OR bandura OR Weinstein OR de-vries).ab,ti,kf.)) OR ((Vaccination Coverage/ OR (((vaccin\* OR immuniz\* OR immunis\* OR guideline\*) ADJ3 (cover\* OR uptake\* OR adherence\* OR compliance\* OR hesitan\* OR behavior\* OR behaviour\* OR decision\* OR status\* OR rate\* OR acceptanc\* OR refus\*)))ab,ti,kf.) AND (exp Behavior/ OR (((behavior\* OR behaviour\* OR habit\* OR practice\* OR attitude\* OR ASE OR trans- theor\* OR health-belief\* OR social-cognitive\* OR precautions-adoption-process\* OR integrated-change\* OR i-change\* OR theor\*) ADJ3 (change\*

OR modif\* OR alter\* OR model\* OR framework\* OR intervention\* OR theor\*)) OR fishbein OR  
ajzen OR prochaska OR diclemente OR hochbaum OR kegels OR rosenstock OR bandura OR  
Weinstein OR de-vries).ab,ti,kf.) AND (Travel/ OR (travel\* OR VFR OR visiting-friends-and-  
relatives\* OR expat\* OR emigrant\* OR pilgrim\* OR touris\*).ab,ti,kf.)) AND english.lg.

## Web of Science

TS(((((((vaccin\* OR immuniz\* OR immunis\*) NEAR/2 (cover\* OR uptake\* OR adherence\* OR compliance\* OR hesitan\* OR behavior\* OR behaviour\* OR decision\* OR status\* OR rate\* OR acceptanc\* OR refus\*)))) AND (((behavior\* OR behaviour\* OR habit\* OR practice\* OR attitude\* OR ASE OR trans-theor\* OR health-belief\* OR social-cognitive\* OR precautions-adoption-process\* OR integrated-change\* OR i-change\* OR theor\*) NEAR/2 (change\* OR modif\* OR alter\* OR model\* OR framework\* OR intervention\* OR theor\*)) OR fishbein OR ajzen OR prochaska OR diclemente OR hochbaum OR kegels OR rosenstock OR bandura OR Weinstein OR de-vries)) AND ((immunocompromi\* OR compromi\* OR immunosuppress\* OR autoimmune\* OR auto-immune\* OR arthritis\* OR rheuma\* OR psoriasis\* OR IBD OR SLE OR lupus\* OR systemic-scleros\* OR inflammatory-bowel\* OR crohn\* OR colitis\* OR ((HIV OR immunodeficiency OR cancer\*) NEAR/2 (patient\* OR adult\* OR survivor\* OR person\*)) OR ((transplant\* OR graft\*) NEAR/2 (recipient\* OR host\* OR stem-cell\* OR organ\*)))) OR ((((((vaccin\* OR immuniz\* OR immunis\*) NEAR/2 (cover\* OR uptake\* OR adherence\* OR compliance\* OR hesitan\* OR behavior\* OR behaviour\* OR decision\* OR status\* OR rate\* OR acceptanc\* OR refus\*) NEAR/2 (clinician\* OR nurs\* OR physician\* OR specialist\* OR doctor\* OR personnel OR provider\* OR health-care-worker\* OR HCWs OR HCW OR professional\* OR practitioner\*)))) AND (((behavior\* OR behaviour\* OR ASE OR trans-theor\* OR health-belief\* OR social-cognitive\* OR precautions-adoption-process\* OR integrated-change\* OR i-change\* OR theor\*) NEAR/2 (change\* OR modif\* OR alter\* OR model\* OR framework\* OR intervention\* OR theor\*)) OR fishbein OR ajzen OR prochaska OR diclemente OR hochbaum OR kegels OR rosenstock OR bandura OR Weinstein OR de-vries))) OR ((((((vaccin\* OR immuniz\* OR immunis\* OR guideline\*) NEAR/2 (cover\* OR uptake\* OR adherence\* OR compliance\* OR hesitan\* OR behavior\* OR behaviour\* OR decision\* OR status\* OR rate\* OR acceptanc\* OR refus\*)))) AND (((behavior\* OR behaviour\* OR habit\* OR practice\* OR attitude\* OR ASE OR trans-theor\* OR health-belief\* OR social-cognitive\* OR precautions-adoption-process\* OR integrated-change\* OR i-change\* OR theor\*) NEAR/2 (change\* OR modif\* OR alter\* OR model\* OR framework\* OR intervention\* OR theor\*)) OR fishbein OR ajzen OR prochaska OR diclemente OR hochbaum OR kegels OR rosenstock OR bandura OR Weinstein OR de-vries)) AND ((travel\* OR VFR OR visiting-friends-and-relatives\* OR expat\* OR emigrant\* OR pilgrim\* OR touris\*)))) AND DT=(Article OR Review) AND LA=English

## PsycINFO (Ovid)

((Immunization/ OR (((vaccin\* OR immuniz\* OR immunis\*) ADJ3 (cover\* OR uptake\* OR adherence\* OR compliance\* OR hesitan\* OR behavior\* OR behaviour\* OR decision\* OR status\* OR rate\* OR acceptanc\* OR refus\*))).ab,ti.) AND (exp Behavior/ OR (((behavior\* OR behaviour\* OR habit\* OR practice\* OR attitude\* OR ASE OR trans-theor\* OR health-belief\* OR social-

cognitive\* OR precautions-adoption- process\* OR integrated-change\* OR i-change\* OR theor\*)  
ADJ3 (change\* OR modif\* OR alter\* OR model\* OR framework\* OR intervention\* OR theor\*))  
OR fishbein OR ajzen OR prochaska OR diclemente OR hochbaum OR kegels OR rosenstock  
OR bandura OR Weinstein OR de-vries).ab,ti.) AND

(Immunodepression/ OR exp Arthritis/ OR exp Colitis/ OR (immunocompromi\* OR compromi\* OR immunosuppress\* OR autoimmune\* OR auto-immune\* OR arthritis\* OR rheuma\* OR psoriasis\* OR IBD OR SLE OR lupus\* OR systemic-scleros\* OR inflammatory-bowel\* OR crohn\* OR colitis\* OR ((HIV OR immunodeficiency OR cancer\*) ADJ3 (patient\* OR adult\* OR survivor\* OR person\*)) OR ((transplant\* OR graft\*) ADJ3 (recipient\* OR host\* OR stem-cell\* OR organ\*))).ab,ti.)) OR (((Immunization/ AND exp Health Personnel/) OR (((vaccin\* OR immuniz\* OR immunis\*) ADJ3 (cover\* OR uptake\* OR adherence\* OR compliance\* OR hesitan\* OR behavior\* OR behaviour\* OR decision\* OR status\* OR rate\* OR acceptanc\* OR refus\*) ADJ3 (clinician\* OR nurs\* OR physician\* OR specialist\* OR doctor\* OR personnel OR provider\* OR health-care-worker\* OR HCWs OR HCW OR professional\* OR practitioner\*))).ab,ti.) AND (exp Behavior/ OR (((behavior\* OR behaviour\* OR ASE OR trans-theor\* OR health-belief\* OR social-cognitive\* OR precautions-adoption-process\* OR integrated-change\* OR i-change\* OR theor\*) ADJ3 (change\* OR modif\* OR alter\* OR model\* OR framework\* OR intervention\* OR theor\*)) OR fishbein OR ajzen OR prochaska OR diclemente OR hochbaum OR kegels OR rosenstock OR bandura OR Weinstein OR de-vries).ab,ti.)) OR ((Immunization/ OR (((vaccin\* OR immuniz\* OR immunis\* OR guideline\*) ADJ3 (cover\* OR uptake\* OR adherence\* OR compliance\* OR hesitan\* OR behavior\* OR behaviour\* OR decision\* OR status\* OR rate\* OR acceptanc\* OR refus\*))).ab,ti.) AND (exp Behavior/ OR (((behavior\* OR behaviour\* OR habit\* OR practice\* OR attitude\* OR ASE OR trans-theor\* OR health-belief\* OR social-cognitive\* OR precautions-adoption-process\* OR integrated-change\* OR i-change\* OR theor\*) ADJ3 (change\* OR modif\* OR alter\* OR model\* OR framework\* OR intervention\* OR theor\*)) OR fishbein OR ajzen OR prochaska OR diclemente OR hochbaum OR kegels OR rosenstock OR bandura OR Weinstein OR de-vries).ab,ti.) AND (Traveling/ OR Tourism/ OR (travel\* OR VFR OR visiting-friends-and- relatives\* OR expat\* OR emigrant\* OR pilgrim\* OR touris\*).ab,ti.)) AND English.lg.

## **ERIC (Ovid)**

((Immunization Programs/ OR (((vaccin\* OR immuniz\* OR immunis\*) ADJ3 (cover\* OR uptake\* OR adherence\* OR compliance\* OR hesitan\* OR behavior\* OR behaviour\* OR decision\* OR status\* OR rate\* OR acceptanc\* OR refus\*))).ab,ti.) AND (exp Behavior/ OR (((behavior\* OR behaviour\* OR habit\* OR practice\* OR attitude\* OR ASE OR trans-theor\* OR health-belief\* OR social-cognitive\* OR precautions-adoption-process\* OR integrated-change\* OR i-change\* OR theor\*) ADJ3 (change\* OR modif\* OR alter\* OR model\* OR framework\* OR intervention\* OR theor\*)) OR fishbein OR ajzen OR prochaska OR diclemente OR hochbaum OR kegels OR rosenstock OR bandura OR Weinstein OR de- vries).ab,ti.) AND ((immunocompromi\* OR compromi\* OR immunosuppress\* OR autoimmune\* OR auto-immune\* OR arthritis\* OR rheuma\* OR psoriasis\* OR IBD OR SLE OR lupus\* OR systemic-scleros\* OR inflammatory-bowel\* OR crohn\* OR colitis\* OR ((HIV OR immunodeficiency OR cancer\*) ADJ3 (patient\* OR adult\* OR survivor\* OR person\*)) OR ((transplant\* OR graft\*) ADJ3 (recipient\* OR host\* OR stem-cell\* OR organ\*))).ab,ti.)) OR (((Immunization Programs/ AND exp Health Personnel/) OR (((vaccin\* OR immuniz\* OR immunis\*) ADJ3 (cover\* OR

uptake\* OR adherence\* OR compliance\* OR  
hesitan\* OR behavior\* OR behaviour\* OR decision\* OR status\* OR rate\* OR acceptanc\* OR  
refus\*) ADJ3 (clinician\* OR nurs\* OR physician\* OR specialist\* OR doctor\* OR personnel OR  
provider\* OR health- care-worker\* OR HCWs OR HCW OR professional\* OR  
practitioner\*))) .ab,ti.) AND (exp Behavior/ OR (((behavior\* OR behaviour\* OR ASE OR trans-  
theor\* OR health-belief\* OR social-cognitive\* OR



precautions-adoption-process\* OR integrated-change\* OR i-change\* OR theor\*) ADJ3 (change\* OR modif\* OR alter\* OR model\* OR framework\* OR intervention\* OR theor\*)) OR fishbein OR ajzen OR prochaska OR diclemente OR hochbaum OR kegels OR rosenstock OR bandura OR Weinstein OR de- vries).ab,ti.)) OR ((Immunization Programs/ OR (((vaccin\* OR immuniz\* OR immunis\* OR guideline\*) ADJ3 (cover\* OR uptake\* OR adherence\* OR compliance\* OR hesitan\* OR behavior\* OR behaviour\* OR decision\* OR status\* OR rate\* OR acceptanc\* OR refus\*))).ab,ti.) AND (exp Behavior/ OR (((behavior\* OR behaviour\* OR habit\* OR practice\* OR attitude\* OR ASE OR trans-theor\* OR health-belief\* OR social-cognitive\* OR precautions-adoption-process\* OR integrated-change\* OR i-change\* OR theor\*) ADJ3 (change\* OR modif\* OR alter\* OR model\* OR framework\* OR intervention\* OR theor\*)) OR fishbein OR ajzen OR prochaska OR diclemente OR hochbaum OR kegels OR rosenstock OR bandura OR Weinstein OR de-vries).ab,ti.) AND (Travel/ OR Tourism/ OR (travel\* OR VFR OR visiting-friends-and-relatives\* OR expat\* OR emigrant\* OR pilgrim\* OR touris\*).ab,ti.)) AND english.lg.

## CINAHL EBSCO

(( **TI** (((vaccin\* OR immuniz\* OR immunis\*) N2 (cover\* OR uptake\* OR adherence\* OR compliance\* OR hesitan\* OR behavior\* OR behaviour\* OR decision\* OR status\* OR rate\* OR acceptanc\* OR refus\*))) OR **AB** (((vaccin\* OR immuniz\* OR immunis\*) N2 (cover\* OR uptake\* OR adherence\* OR compliance\* OR hesitan\* OR behavior\* OR behaviour\* OR decision\* OR status\* OR rate\* OR acceptanc\* OR refus\*)))) AND ( **TI** (((behavior\* OR behaviour\* OR habit\* OR practice\* OR attitude\* OR ASE OR trans-theor\* OR health-belief\* OR social-cognitive\* OR precautions-adoption-process\* OR integrated-change\* OR i- change\* OR theor\*) N2 (change\* OR modif\* OR alter\* OR model\* OR framework\* OR intervention\* OR theor\*)) OR fishbein OR ajzen OR prochaska OR diclemente OR hochbaum OR kegels OR rosenstock OR bandura OR Weinstein OR de-vries) OR **AB** (((behavior\* OR behaviour\* OR habit\* OR practice\* OR attitude\* OR ASE OR trans-theor\* OR health-belief\* OR social-cognitive\* OR precautions-adoption-process\* OR integrated-change\* OR i-change\* OR theor\*) N2 (change\* OR modif\* OR alter\* OR model\* OR framework\* OR intervention\* OR theor\*)) OR fishbein OR ajzen OR prochaska OR diclemente OR hochbaum OR kegels OR rosenstock OR bandura OR Weinstein OR de-vries)) AND ( **TI** (immunocompromi\* OR compromi\* OR immunosuppress\* OR autoimmune\* OR auto-immune\* OR arthritis\* OR rheuma\* OR psoriasis\* OR IBD OR SLE OR lupus\* OR systemic-scleros\* OR inflammatory- bowel\* OR crohn\* OR colitis\* OR ((HIV OR immunodeficiency OR cancer\*) N2 (patient\* OR adult\* OR survivor\* OR person\*)) OR ((transplant\* OR graft\*) N2 (recipient\* OR host\* OR stem-cell\* OR organ\*))) OR **AB** (immunocompromi\* OR compromi\* OR immunosuppress\* OR autoimmune\* OR auto-immune\* OR arthritis\* OR rheuma\* OR psoriasis\* OR IBD OR SLE OR lupus\* OR systemic-scleros\* OR inflammatory-bowel\* OR crohn\* OR colitis\* OR ((HIV OR immunodeficiency OR cancer\*) N2 (patient\* OR adult\* OR survivor\* OR person\*)) OR ((transplant\* OR graft\*) N2 (recipient\* OR host\* OR stem-cell\* OR organ\*)))) OR (( **TI** (((vaccin\* OR immuniz\* OR

immunis\*) N2 (cover\* OR uptake\* OR adherence\* OR compliance\* OR hesitan\* OR behavior\* OR behaviour\* OR decision\* OR status\* OR rate\* OR acceptanc\* OR refus\*) N2 (clinician\* OR nurs\* OR physician\* OR specialist\* OR doctor\* OR personnel OR provider\* OR health-care-worker\* OR HCWs OR HCW OR professional\* OR practitioner\*)) OR **AB** (((vaccin\* OR immuniz\* OR immunis\*) N2 (cover\* OR uptake\* OR adherence\* OR compliance\* OR hesitan\* OR

behavior\* OR behaviour\* OR decision\* OR status\* OR rate\* OR acceptanc\* OR refus\*) N2 (clinician\* OR nurs\* OR physician\* OR specialist\* OR doctor\* OR personnel OR provider\* OR health-care-worker\* OR HCWs OR HCW OR professional\* OR practitioner\*)) AND ( TI (((behavior\* OR behaviour\* OR ASE OR trans-theor\* OR health-belief\* OR social-cognitive\* OR precautions-adoption-process\* OR integrated- change\* OR i-change\* OR theor\*) N2 (change\* OR modif\* OR alter\* OR model\* OR framework\* OR intervention\* OR theor\*)) OR fishbein OR ajzen OR prochaska OR diclemente OR hochbaum OR kegel OR rosenstock OR bandura OR Weinstein OR de-vries) OR AB (((behavior\* OR behaviour\* OR ASE OR trans-theor\* OR health-belief\* OR social-cognitive\* OR precautions-adoption-process\* OR integrated- change\* OR i-change\* OR theor\*) N2 (change\* OR modif\* OR alter\* OR model\* OR framework\* OR intervention\* OR theor\*)) OR fishbein OR ajzen OR prochaska OR diclemente OR hochbaum OR kegel OR rosenstock OR bandura OR Weinstein OR de-vries))) OR (( TI (((vaccin\* OR immuniz\* OR immunis\* OR guideline\*) N2 (cover\* OR uptake\* OR adherence\* OR compliance\* OR hesitan\* OR behavior\* OR behaviour\* OR decision\* OR status\* OR rate\* OR acceptanc\* OR refus\*))) OR AB (((vaccin\* OR immuniz\* OR immunis\* OR guideline\*) N2 (cover\* OR uptake\* OR adherence\* OR compliance\* OR hesitan\* OR behavior\* OR behaviour\* OR decision\* OR status\* OR rate\* OR acceptanc\* OR refus\*))) AND ( TI (((behavior\* OR behaviour\* OR habit\* OR practice\* OR attitude\* OR ASE OR trans-theor\* OR health-belief\* OR social-cognitive\* OR precautions-adoption-process\* OR integrated-change\* OR i- change\* OR theor\*) N2 (change\* OR modif\* OR alter\* OR model\* OR framework\* OR intervention\* OR theor\*)) OR fishbein OR ajzen OR prochaska OR diclemente OR hochbaum OR kegel OR rosenstock OR bandura OR Weinstein OR de-vries) OR AB (((behavior\* OR behaviour\* OR habit\* OR practice\* OR attitude\* OR ASE OR trans-theor\* OR health-belief\* OR social-cognitive\* OR precautions-adoption- process\* OR integrated-change\* OR i-change\* OR theor\*) N2 (change\* OR modif\* OR alter\* OR model\* OR framework\* OR intervention\* OR theor\*)) OR fishbein OR ajzen OR prochaska OR diclemente OR hochbaum OR kegel OR rosenstock OR bandura OR Weinstein OR de-vries)) AND ( TI (travel\* OR VFR OR visiting-friends-and-relatives\* OR expat\* OR emigrant\* OR pilgrim\* OR touris\*) OR AB (travel\* OR VFR OR visiting-friends-and-relatives\* OR expat\* OR emigrant\* OR pilgrim\* OR touris\*))

## **SocINDEX EBSCO – zonder behavior element (Via Laura Doornekamp / Maastricht University)**

(( TI (((vaccin\* OR immuniz\* OR immunis\*) N2 (cover\* OR uptake\* OR adherence\* OR compliance\* OR hesitan\* OR behavior\* OR behaviour\* OR decision\* OR status\* OR rate\* OR acceptanc\* OR refus\*))) OR AB (((vaccin\* OR immuniz\* OR immunis\*) N2 (cover\* OR uptake\* OR adherence\* OR compliance\* OR hesitan\* OR behavior\* OR behaviour\* OR decision\* OR status\* OR rate\* OR acceptanc\* OR refus\*))) AND ( TI (immunocompromi\* OR compromi\* OR immunosuppress\* OR autoimmune\* OR auto- immune\* OR arthritis\* OR rheuma\* OR psoriasis\* OR IBD OR SLE OR lupus\* OR systemic-scleros\* OR inflammatory-bowel\* OR crohn\* OR colitis\* OR ((HIV OR immunodeficiency OR cancer\*) N2 (patient\* OR adult\* OR

survivor\* OR person\*)) OR ((transplant\* OR graft\*) N2 (recipient\* OR host\* OR stem-cell\* OR organ\*)) OR **AB** (immunocompromi\* OR compromi\* OR immunosuppress\* OR autoimmune\* OR auto-immune\* OR arthritis\* OR rheuma\* OR psoriasis\* OR IBD OR SLE OR lupus\* OR systemic-scleros\* OR inflammatory-bowel\* OR crohn\* OR colitis\* OR ((HIV OR immunodeficiency OR cancer\*) N2 (patient\* OR adult\* OR survivor\* OR person\*)) OR ((transplant\* OR graft\*) N2 (recipient\* OR host\* OR

stem-cell\* OR organ\*)))) OR (( **TI** (((vaccin\* OR immuniz\* OR immunis\*) N2 (cover\* OR uptake\* OR adherence\* OR compliance\* OR hesitan\* OR behavior\* OR behaviour\* OR decision\* OR status\* OR rate\* OR acceptanc\* OR refus\*) N2 (clinician\* OR nurs\* OR physician\* OR specialist\* OR doctor\* OR personnel OR provider\* OR health-care-worker\* OR HCWs OR HCW OR professional\* OR practitioner\*)))) OR **AB** (((vaccin\* OR immuniz\* OR immunis\*) N2 (cover\* OR uptake\* OR adherence\* OR compliance\* OR hesitan\* OR behavior\* OR behaviour\* OR decision\* OR status\* OR rate\* OR acceptanc\* OR refus\*) N2 (clinician\* OR nurs\* OR physician\* OR specialist\* OR doctor\* OR personnel OR provider\* OR health-care-worker\* OR HCWs OR HCW OR professional\* OR practitioner\*)))) OR (( **TI** (((vaccin\* OR immuniz\* OR immunis\* OR guideline\*) N2 (cover\* OR uptake\* OR adherence\* OR compliance\* OR hesitan\* OR behavior\* OR behaviour\* OR decision\* OR status\* OR rate\* OR acceptanc\* OR refus\*))) OR **AB** (((vaccin\* OR immuniz\* OR immunis\* OR guideline\*) N2 (cover\* OR uptake\* OR adherence\* OR compliance\* OR hesitan\* OR behavior\* OR behaviour\* OR decision\* OR status\* OR rate\* OR acceptanc\* OR refus\*)))) AND ( **TI** (travel\* OR VFR OR visiting-friends-and-relatives\* OR expat\* OR emigrant\* OR pilgrim\* OR touris\*) OR **AB** (travel\* OR VFR OR visiting-friends-and-relatives\* OR expat\* OR emigrant\* OR pilgrim\* OR touris\*))
