# Supplementary material for: Determinants of Vaccination Uptake in Risk Populations: A Comprehensive Literature Review
Source: MDPI journal article supplement (doi:10.3390/vaccines8030480), 2020-08-27
Supplement: s1 [file s1]

|                                                                                                                                                       | Balaban, 2013 | Barasheed, 2014 | Duffy, 2013 | Frew, 2017 |
|-------------------------------------------------------------------------------------------------------------------------------------------------------|---------------|-----------------|-------------|------------|
| <b>AXIS items scoring</b>                                                                                                                             |               |                 |             |            |
| Were the aims/objectives of the study clear?                                                                                                          | 1             | 1               | 1           | 1          |
| Was the study design appropriate for the stated aim(s)?                                                                                               | 0             | 1               | 1           | 1          |
| Was the sample size justified?                                                                                                                        | 0             | 1               | 1           | 0          |
| Was the target/reference population clearly defined? (Is it clear who the research was about?)                                                        | 0             | 1               | 1           | 1          |
| Was the sample frame taken from an appropriate population base so that it closely represented the target/reference population under investigation?    | x             | 1               | 1           | 1          |
| Was the selection process likely to select subjects/participants that were representative of the target/reference population under investigation?     | x             | 1               | 1           | 1          |
| Were measures undertaken to address and categorise non-responders?                                                                                    | x             | 0               | 0           | 0          |
| Were the risk factor and outcome variables measured appropriate to the aims of the study?                                                             | 1             | 1               | 1           | 1          |
| Were the risk factor and outcome variables measured correctly using instruments/measurements that had been trialled, piloted or published previously? | x             | 1               | 0           | 0          |
| Is it clear what was used to determined statistical significance and/or precision estimates? (eg, p values, CIs)                                      | 1             | 1               | 1           | 1          |
| Were the methods (including statistical methods) sufficiently described to enable them to be repeated?                                                | 0             | 0               | 0           | 0          |
| Were the basic data adequately described?                                                                                                             | 0             | 1               | 1           | 1          |
| <b>Does the response rate raise concerns about non-response bias? (1 = no concerns)</b>                                                               | x             | 1               | 0           | 1          |
| If appropriate, was information about non-responders described?                                                                                       | x             | 0               | 0           | 0          |
| Were the results internally consistent?                                                                                                               | 1             | 1               | 1           | 1          |
| Were the results for the analyses described in the methods, presented?                                                                                | x             | 0               | 1           | 1          |
| Were the authors' discussions and conclusions justified by the results?                                                                               | 1             | 1               | 1           | 1          |
| Were the limitations of the study discussed?                                                                                                          | 0             | 1               | 1           | 1          |
| <b>Were there any funding sources or conflicts of interest that may affect the authors' interpretation of the results? (1 = no conflicts/funding)</b> | 1             | 0               | 1           | 1          |
| Was ethical approval or consent of participants attained?                                                                                             | x             | 1               | 0           | 1          |
| <b>TOTAL</b>                                                                                                                                          | 6             | 15              | 14          | 15         |

|    | Goodman, 2014 | Herbinger, 2011 | Heywood, 2016 | Igreja, 2019 | Lammert, 2016 | Paudel, 2017 | Pavli, 2019 | Pfeil, 2010 | Selcuk, 2016 | Tan, 2017 | Tashani, 2016 | Wiemken, 2015 | Yanni, 2010 | Akin, 2016 | Althoff, 2010 | Battistella, 2019 | Chehab, 2018 | Chin-Yee, 2011 | Gagneux-Brunon, 2019 | Haron, 2011 | Harrison, 2017 | Harrison, 2018 | Lachenal, 2010 | Loubet, 2015 | Loubet, 2018 | Malhi, 2015 | Miller, 2018 | Mouthon, 2010 | Narula, 2012 | Nguyen, 2017 | Poepl, 2015 | Price, 2019 | Restivo, 2017 | Ruiz-Cuesta, 2016 | Sadlier, 2015 | Sandler, 2016 | Savage, 2011 | Struijk, 2015 | Teich, 2011 |   |   |   |
|----|---------------|-----------------|---------------|--------------|---------------|--------------|-------------|-------------|--------------|-----------|---------------|---------------|-------------|------------|---------------|-------------------|--------------|----------------|----------------------|-------------|----------------|----------------|----------------|--------------|--------------|-------------|--------------|---------------|--------------|--------------|-------------|-------------|---------------|-------------------|---------------|---------------|--------------|---------------|-------------|---|---|---|
| 1  | 1             | 1               | 1             | 1            | 1             | 1            | 1           | 1           | 0            | 1         | 1             | 1             | 1           | 1          | 1             | 1                 | 1            | 1              | 1                    | 1           | 1              | 1              | 0              | 1            | 1            | 1           | 1            | 1             | 1            | 1            | 1           | 1           | 1             | 1                 | 1             | 1             | 1            | 1             | 1           | 1 | 1 |   |
| 1  | 0             | 1               | 1             | 1            | 1             | 1            | 0           | 1           | 1            | 1         | 1             | 1             | 1           | 1          | 1             | 1                 | 1            | 1              | 1                    | 1           | 1              | 1              | 1              | 1            | 1            | 1           | 1            | 1             | 1            | 1            | 1           | 1           | 1             | 1                 | 1             | 1             | 1            | 1             | 1           | 1 | 1 | 1 |
| 0  | 1             | 1               | 0             | 1            | 1             | 1            | 1           | 1           | 0            | 1         | 1             | 0             | 1           | 0          | 1             | 1                 | 1            | 0              | 1                    | 1           | 1              | 1              | 1              | 1            | 1            | 1           | 1            | 0             | 0            | 1            | 1           | 1           | 1             | 1                 | 0             | 0             | 0            | 0             | 0           | 0 | 0 | 0 |
| 1  | 1             | 1               | 1             | 1            | 1             | 1            | 1           | 0           | 1            | 1         | 1             | 1             | 1           | 1          | 1             | 1                 | 0            | 1              | 1                    | 0           | 1              | 0              | 1              | 1            | 1            | 1           | 1            | 1             | 1            | 0            | 1           | 0           | 1             | 1                 | 1             | 1             | 1            | 1             | 1           | 1 | 1 | 1 |
| 1  | 0             | 1               | 0             | 1            | 1             | 1            | 1           | 1           | 1            | 1         | 1             | 1             | 1           | 1          | 1             | 1                 | 1            | 1              | 0                    | 1           | 1              | 1              | 1              | 0            | 0            | 0           | 0            | 1             | 1            | 1            | 1           | 1           | 1             | 1                 | 1             | 1             | 1            | 1             | 1           | 1 | 1 | 1 |
| 0  | 0             | 0               | 0             | 0            | 0             | 1            | 1           | 1           | 0            | 1         | 0             | 1             | 1           | 1          | 1             | 1                 | 1            | 1              | x                    | 1           | 1              | 1              | 0              | 0            | 0            | 0           | 0            | 1             | 1            | 0            | 1           | 1           | 0             | 1                 | 1             | 1             | 1            | 1             | 0           | 1 | 1 |   |
| 0  | 0             | 0               | 0             | 0            | x             | 0            | 0           | 0           | 0            | 0         | 0             | 0             | 0           | 0          | 0             | 0                 | 0            | 0              | 0                    | x           | 0              | 0              | 0              | 0            | 0            | 0           | 0            | 0             | 0            | 1            | 0           | 0           | 0             | 0                 | 0             | 0             | 0            | 1             | 0           | 1 | 1 |   |
| 1  | 0             | 1               | 1             | x            | 1             | 1            | 1           | 1           | 1            | 1         | 1             | 1             | 1           | 1          | 1             | 1                 | 1            | 1              | 1                    | 1           | 1              | 1              | 1              | 1            | 0            | 0           | 1            | 1             | 1            | 0            | 1           | 0           | 0             | 0                 | 1             | 1             | 0            | 1             | 1           | 1 | 1 |   |
| 0  | 0             | 0               | 0             | 0            | 0             | 0            | 0           | 0           | 1            | 0         | 0             | 1             | 0           | 0          | 0             | 1                 | 1            | 0              | 0                    | 0           | 0              | 0              | 1              | 0            | 0            | 0           | 0            | 1             | 0            | 0            | 0           | 0           | 1             | 0                 | 0             | 1             | 0            | 1             | 1           | 1 | 1 |   |
| 1  | 1             | x               | x             | 1            | 1             | 1            | 1           | 1           | 1            | 1         | 0             | 1             | 1           | 1          | 0             | 1                 | 1            | 0              | 0                    | 0           | 1              | 1              | 0              | 1            | 1            | 1           | 1            | 1             | 1            | 1            | 1           | 1           | 0             | 1                 | 1             | 1             | 1            | 1             | 1           | 1 | 1 |   |
| 0  | 1             | 0               | 0             | 1            | 0             | 1            | 1           | 1           | 1            | 1         | 1             | 1             | 0           | 0          | 0             | 1                 | 0            | 1              | 0                    | 0           | 0              | 0              | 0              | 0            | 0            | 1           | 0            | 1             | 1            | 0            | 1           | 1           | 1             | 0                 | 0             | 0             | 1            | 1             | 1           | 1 | 1 |   |
| 0  | 1             | 0               | 1             | 1            | 1             | 1            | 1           | 1           | 1            | 1         | 1             | 1             | 1           | 1          | 1             | 1                 | 1            | 1              | 0                    | 1           | 0              | 0              | 1              | 1            | 1            | 1           | 1            | 1             | 1            | 1            | 1           | 1           | 0             | 1                 | 1             | 1             | 1            | 1             | 1           | 1 | 1 |   |
| 0  | 0             | 0               | 0             | 1            | 0             | 0            | 0           | 1           | 0            | x         | 1             | 0             | 1           | 1          | 1             | 0                 | 1            | 1              | 1                    | 1           | x              | x              | 1              | 0            | x            | 0           | 0            | x             | 1            | 1            | 0           | 0           | 0             | x                 | 0             | 1             | 0            | 0             | 0           | 0 | 1 | 1 |
| x  | 0             | 0               | 0             | 0            | x             | 0            | 0           | 0           | 0            | x         | 0             | 0             | 1           | 0          | 0             | 0                 | 0            | 0              | 0                    | x           | x              | x              | 0              | 0            | 0            | x           | 0            | 0             | x            | 1            | 0           | 0           | 0             | x                 | 0             | 0             | 0            | 0             | 0           | 1 | 1 |   |
| 1  | 1             | 1               | 1             | 1            | 1             | 1            | 1           | 0           | 0            | 1         | 1             | 1             | 1           | 1          | 1             | 1                 | 1            | 1              | 1                    | 1           | 1              | 1              | 1              | 1            | 1            | 1           | 1            | 1             | 1            | 1            | 1           | 1           | 1             | 1                 | 1             | 1             | 1            | 1             | 1           | 1 | 1 |   |
| 1  | 1             | 1               | x             | 1            | 0             | 1            | 1           | 1           | 1            | 1         | 1             | 1             | 1           | 1          | 1             | 1                 | 1            | 1              | 0                    | 1           | 1              | 1              | 0              | 1            | 1            | 1           | 1            | 1             | 1            | 1            | 1           | 1           | 1             | 1                 | 1             | 0             | 1            | 1             | 1           | 1 | 1 |   |
| 1  | 0             | 1               | 1             | 1            | 1             | 1            | 1           | 1           | 1            | 1         | 1             | 1             | 1           | 1          | 1             | 1                 | 1            | 1              | 1                    | 1           | 1              | 1              | 1              | 1            | 1            | 1           | 1            | 1             | 1            | 1            | 0           | 1           | 1             | 1                 | 1             | 1             | 1            | 1             | 1           | 1 | 1 |   |
| 1  | 1             | 1               | 0             | 1            | 1             | 1            | 1           | 1           | 1            | 1         | 1             | 1             | 1           | 0          | 0             | 1                 | 0            | 0              | 0                    | 0           | 0              | 1              | 0              | 1            | 1            | 1           | 1            | 1             | 0            | 1            | 1           | 0           | 1             | 1                 | 1             | 0             | 1            | 1             | 1           | 1 | 1 | 1 |
| 1  | 0             | 0               | 1             | 1            | 0             | 0            | 1           | 1           | 1            | 1         | 0             | 0             | 1           | 1          | 1             | 1                 | 1            | 1              | 1                    | 1           | 1              | 1              | 1              | 0            | 1            | 1           | 1            | 1             | x            | x            | 1           | 1           | 1             | 1                 | 0             | 1             | 1            | 1             | 1           | 1 | 1 | 1 |
| 1  | 1             | 1               | 0             | 1            | 1             | 1            | 1           | 1           | 1            | 1         | 1             | 1             | 1           | 1          | 1             | 1                 | 1            | x              | 1                    | 1           | 1              | 1              | 1              | 1            | 1            | 1           | 1            | 1             | 1            | 1            | 1           | 1           | 1             | 1                 | 0             | 0             | 0            | 0             | 1           | 0 |   |   |
| 12 | 10            | 11              | 8             | 15           | 13            | 14           | 15          | 13          | 16           | 14        | 15            | 17            | 14          | 14         | 16            | 16                | 14           | 8              | 14                   | 13          | 13             | 12             | 12             | 13           | 15           | 16          | 13           | 15            | 16           | 11           | 14          | 14          | 13            | 12                | 16            | 14            | 19           | 18            |             |   |   |   |



|                       |    |    |    |    |    |    |    |    |
|-----------------------|----|----|----|----|----|----|----|----|
| Tanguy, 2018          | 1  | 1  | 1  | 1  | 1  | 1  | 1  | 1  |
| Vallée-Tourange, 2018 | 1  | 1  | 1  | 1  | 1  | 1  | 1  | 1  |
| Verger, 2016          | 0  | 0  | 0  | 1  | 0  | 0  | 0  | 0  |
| Virsedá, 2010         | 1  | 1  | 1  | 1  | 1  | 0  | 1  | 1  |
| Wicker, 2010          | 1  | 1  | 1  | 1  | 1  | 0  | 0  | 0  |
| Wilson, 2019          | 1  | 1  | 1  | 1  | 1  | 1  | 1  | 1  |
| Wilson, 2020          | 0  | 0  | 1  | 0  | 0  | 1  | 0  | 0  |
| Zhang, 2011 & 2012    | 1  | 1  | 1  | 1  | 1  | 1  | 1  | 1  |
|                       | 0  | 0  | 1  | 0  | 0  | 1  | 1  | 1  |
|                       | 0  | 1  | 1  | 1  | 1  | 1  | 1  | 1  |
|                       | 0  | 1  | 0  | 0  | 0  | 0  | 0  | 0  |
|                       | 1  | 1  | 1  | 1  | 1  | 1  | 1  | 1  |
|                       | 0  | 0  | 0  | 0  | 0  | 0  | 0  | 0  |
|                       | 0  | 0  | 1  | 0  | 0  | 0  | 0  | 0  |
|                       | 1  | 1  | 1  | 1  | 1  | 1  | 1  | 1  |
|                       | 1  | 1  | 1  | 1  | 1  | 1  | 1  | 1  |
|                       | 1  | 1  | 1  | 1  | 1  | 1  | 1  | 1  |
|                       | 0  | 1  | 1  | 1  | 1  | 1  | 1  | 1  |
|                       | 0  | 0  | 1  | x  | 1  | 1  | 1  | 0  |
|                       | 1  | 1  | 1  | 1  | 1  | x  | x  | 1  |
|                       | 11 | 14 | 17 | 14 | 14 | 13 | 13 | 13 |
